# Supplementary material
Source: PubMed Central journal article supplement (PMC8380434)
Supplement: NIHMS1708556-supplement-Supplementary_Material.pdf [file NIHMS1708556-supplement-Supplementary_Material.pdf]

**Supplementary information**

---

**An ensemble of neural networks provides expert-level prenatal detection of complex congenital heart disease**

---

In the format provided by the authors and unedited

## **Supplementary Information**

Ensemble learning models provide expert-level prenatal detection of complex congenital heart disease

Rima Arnaout MD, Lara Curran MBBS, Yili Zhao PhD RDCS, Jami C. Levine MD, Erin Chinn MS, Anita J. Moon-Grady MD

## Supplemental Tables

**Table S1. Training and test datasets.**

| Data Source                         | Dataset Name | Dataset Notes                                                                                                                           | Normal Echo | CHD Echo | Normal US | CHD US | Total |
|-------------------------------------|--------------|-----------------------------------------------------------------------------------------------------------------------------------------|-------------|----------|-----------|--------|-------|
| UCSF – Source Data                  | Training     | 90% of Source Data<br>Subset of studies used for:<br>- view classifier: 926<br>- diagnostic classifiers: 1,316<br>- segmentation: 1,248 | 787         | 400      | 139       |        | 1,326 |
|                                     | FETAL-125    | 10% of Source Data, by lesion                                                                                                           | 88          | 37       |           |        | 125   |
| UCSF – Additional Data              | OB-125       | same patients as in FETAL-125                                                                                                           |             |          | 88        | 37     | 125   |
| UCSF – Additional Data              | OB-4000      | includes OB-125                                                                                                                         |             |          | 4,071     | 37     | 4,108 |
| UCSF – Additional Data              | TWINS-10     | 10 sets of twins, two sets with 1 normal fetus, 1 CHD fetus                                                                             | 18          | 2        |           |        | 20    |
| Boston Children’s – Additional Data | BCH-400      |                                                                                                                                         | 32          | 391      |           |        | 423   |

CHD, congenital heart disease; Echo; fetal echocardiogram. US, fetal screening ultrasound.

**Table S2. Summary of diagnostic performance in different test cases.** CHD prevalence is again shown to aid in interpretation of predictive values; the prevalence of CHD in a typical population is 0.8–1%, and in a high-risk population is about 5%<sup>10</sup>.

| Method         | Model                   | Model                 | Model                  | Clinicians            | Model                   | Model                  | Model                  | Model |
|----------------|-------------------------|-----------------------|------------------------|-----------------------|-----------------------|-----------------------|-----------------------|-----------------------|-----------------------|-----------------------|-------------------------|------------------------|------------------------|-------|
| Test set       | FETAL-125*              | OB-125*               | OB-125†                | OB-125†               | OB-125‡               | OB-125§               | OB-4000*              | OB-4000†              | OB-4000‡              | BCH-400*              | Twins‡                  | OB-125<br>NL vs. TOF*  | OB-125<br>NL vs. HLHS* |       |
| CHD prevalence | 30%                     | 30%                   | 30%                    | 30%                   | 30%                   | 30%                   | 0.9%                  | 0.9%                  | 0.9%                  | 92%                   | 10%                     | 6%                     | 8%                     |       |
| Sensitivity    | 100%<br>(95% CI 90-100) | 95%<br>(95% CI 84-99) | 88%<br>(95% CI 47-100) | 86%<br>(95% CI 82-90) | 95%<br>(95% CI 83-99) | 92%<br>(95% CI 88-96) | 95%<br>(95% CI 84-99) | 95%<br>(95% CI 84-99) | 95%<br>(95% CI 84-99) | 98%<br>(95% CI 96-99) | 100%<br>(95% CI 15-100) | 71%<br>(95% CI 29-96)  | 89%<br>(95% CI 52-100) |       |
| Specificity    | 62%<br>(95% CI 51-72)   | 68%<br>(95% CI 57-78) | 90%<br>(95% CI 73-98)  | 68%<br>(95% CI 64-72) | 39%<br>(95% CI 28-50) | 59%<br>(95% CI 57-61) | 56%<br>(95% CI 55-58) | 96%<br>(95% CI 95-97) | 41%<br>(95% CI 24-59) | 72%<br>(95% CI 47-90) | 89%<br>(95% CI 80-94)   | 92%<br>(95% CI 84-97)  |                        |       |
| PPV            | 51%<br>(95% CI 45-58)   | 59%<br>(95% CI 51-66) | 70%<br>(95% CI 44-88)  | 44%<br>(95% CI 39-48) | 41%<br>(95% CI 37-46) | 52%<br>(95% CI 50-54) | 2%<br>(95% CI 2)      | 20%<br>(95% CI 17-23) | 95%<br>(95% CI 94-96) | 29%<br>(95% CI 16-46) | 33%<br>(95% CI 19-51)   | 53%<br>(95% CI 35-71)  |                        |       |
| NPV            | 100%<br>(95% CI 100)    | 97%<br>(95% CI 89-99) | 96%<br>(95% CI 81-99)  | 95%<br>(95% CI 95-96) | 94%<br>(95% CI 81-99) | 94%<br>(95% CI 91-97) | 100%<br>(95% CI 100)  | 100%<br>(95% CI 100)  | 59%<br>(95% CI 40-76) | 100%<br>(95% CI 100)  | 98%<br>(95% CI 92-99)   | 99%<br>(95% CI 93-100) |                        |       |
| AUC            | 0.98                    | 0.93                  | 0.98                   | —                     | 0.89                  | 0.91                  | 0.92                  | 0.99                  | 0.89                  | 0.89                  | 0.83                    | 0.98                   |                        |       |

\* All possible images present

† Only 5 images present, one image per view

‡ Low-quality images (target views not chosen by human labelers)

§ 6.5 percent of views scrambled to simulate error in view classification

|| high-confidence images (only used images with view-prediction probabilities greater than the first quartile for diagnosis)

CHD = congenital heart disease, NPV = negative predictive value, PPV = positive predictive value, NL = normal, TOF = tetralogy of Fallot, HLHS = hypoplastic left heart syndrome

**Table S3. Average Jaccard similarities for labeled and predicted anatomic structures.**

| Structure | thorax | heart | RA   | RV   | LA   | LV   | spine | bkgrnd |
|-----------|--------|-------|------|------|------|------|-------|--------|
| Overall   | 0.79   | 0.86  | 0.77 | 0.70 | 0.63 | 0.60 | 0.67  | 0.99   |
| Normal    | 0.80   | 0.87  | 0.82 | 0.77 | 0.72 | 0.78 | 0.69  | 0.99   |
| TOF       | 0.73   | 0.86  | 0.81 | 0.63 | 0.64 | 0.65 | 0.47  | 0.98   |
| HLHS      | 0.77   | 0.82  | 0.66 | 0.59 | 0.47 | 0.29 | 0.62  | 0.99   |

TOF, tetralogy of Fallot; HLHS, hypoplastic left heart syndrome; RA, right atrium; RV, right ventricle; LA, left atrium; LV, left ventricle.
